# Supplementary material for: C-Nitrosation of a β-diketiminate ligand in copper(ii) complex
Source: Royal Society of Chemistry journal article supplement (doi:10.1039/c4ra08281h), 2014-11-21
Supplement: c4ra08281h1.pdf [file c4ra08281h1.pdf]

**Supporting Information**

**for**

**C-nitrosation of a  $\beta$ -diketimininate ligand in copper(II) complex**

Aswini Kalita, Vikash Kumar and Biplab Mondal\*

*Department of Chemistry, Indian Institute of Technology Guwahati, Assam – 781039, India*

*Telephone: 91-361-258-2317; Fax: 91-361-258-2339; Email: [biplab@iitg.ernet.in](mailto:biplab@iitg.ernet.in)*

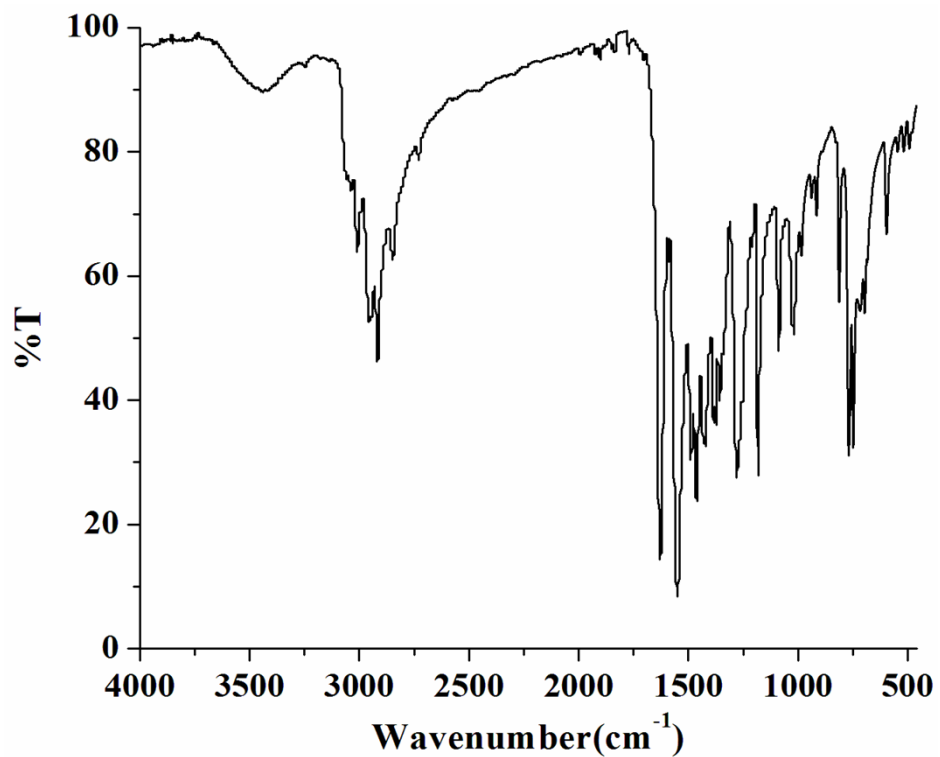

Figure S1: FT-IR spectrum of ligand L in KBr pellet.

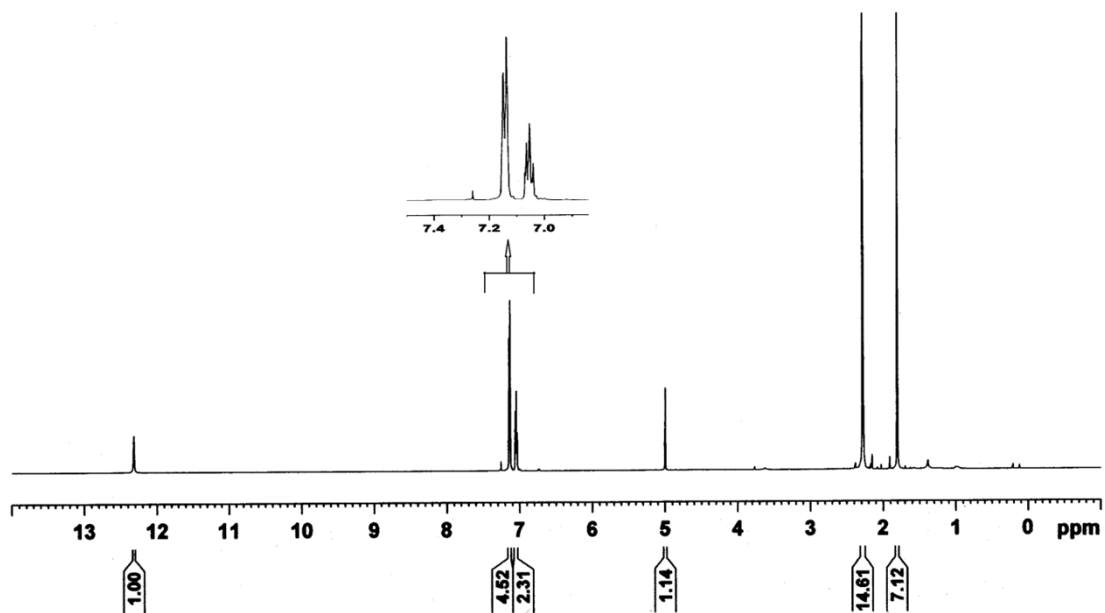

Figure S2: <sup>1</sup>H-NMR spectrum of ligand L in CDCl<sub>3</sub>.

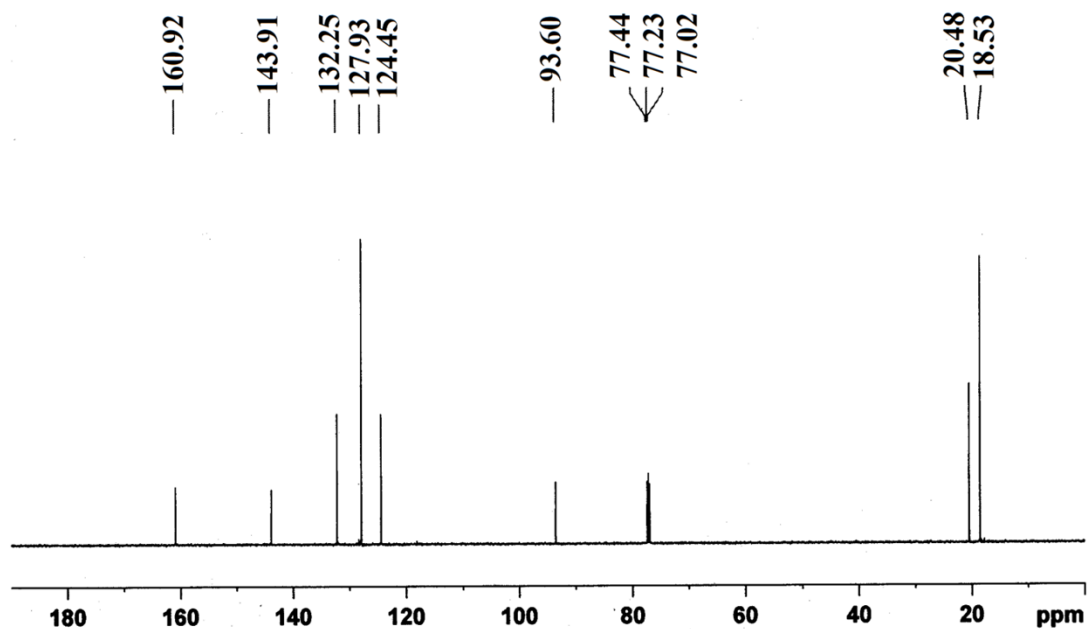

Figure S3:  $^{13}\text{C}$ -NMR spectrum of ligand L in  $\text{CDCl}_3$ .

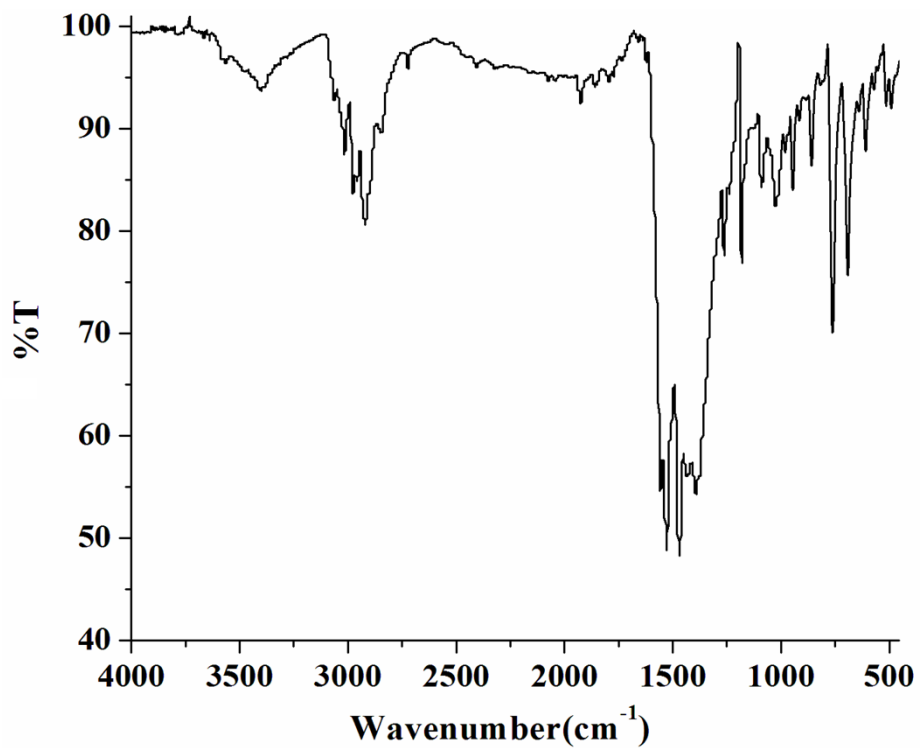

Figure S4: FT-IR spectrum of complex 1 in KBr pellet.

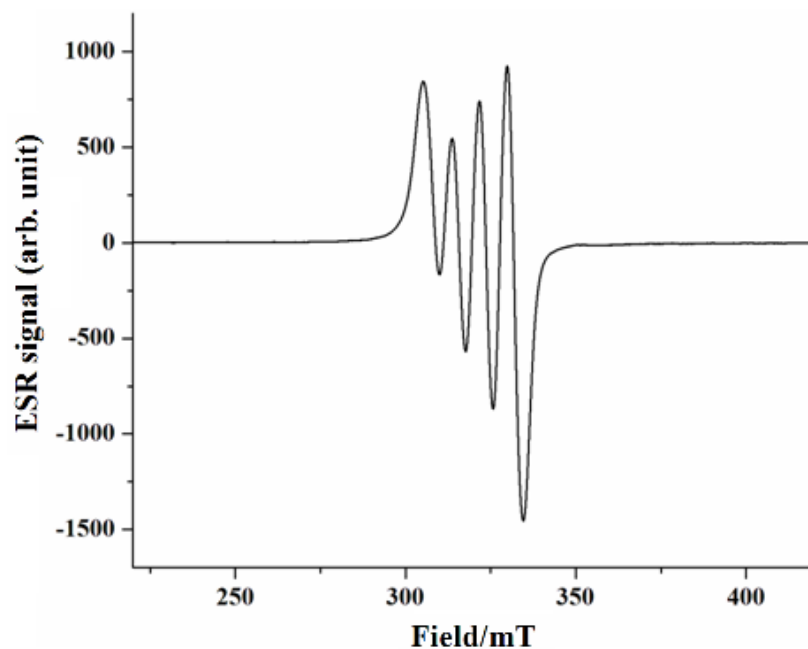

**Figure S5:** X-band ESR spectrum of complex **1** in acetonitrile at room temperature.

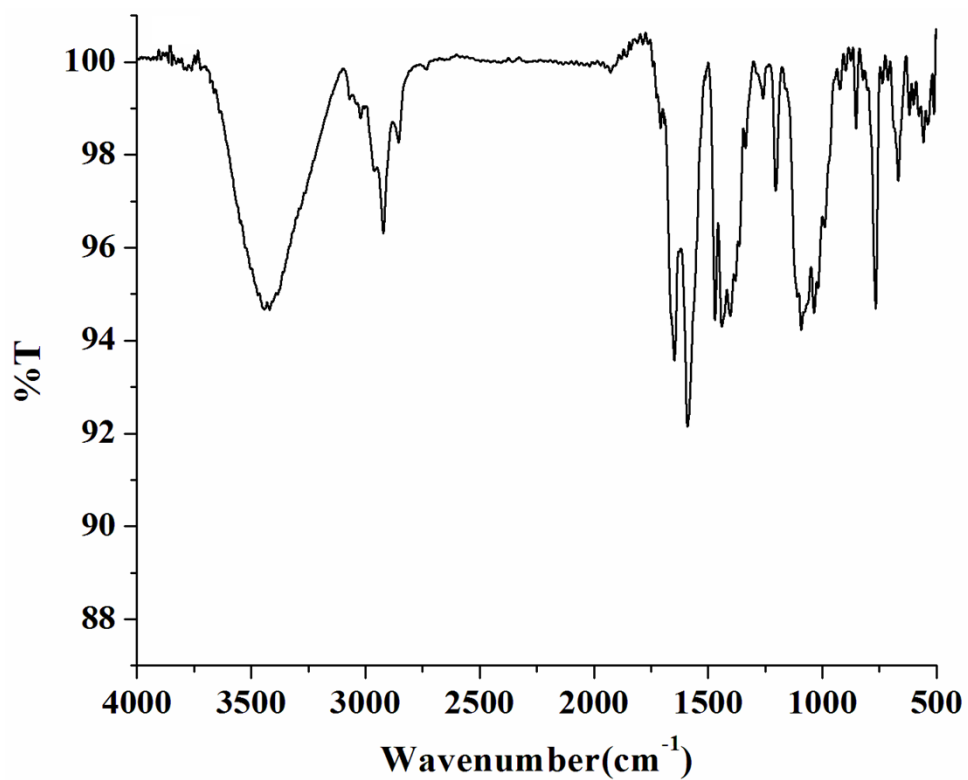

**Figure S7:** FT-IR spectrum of complex **2** in KBr pellet.

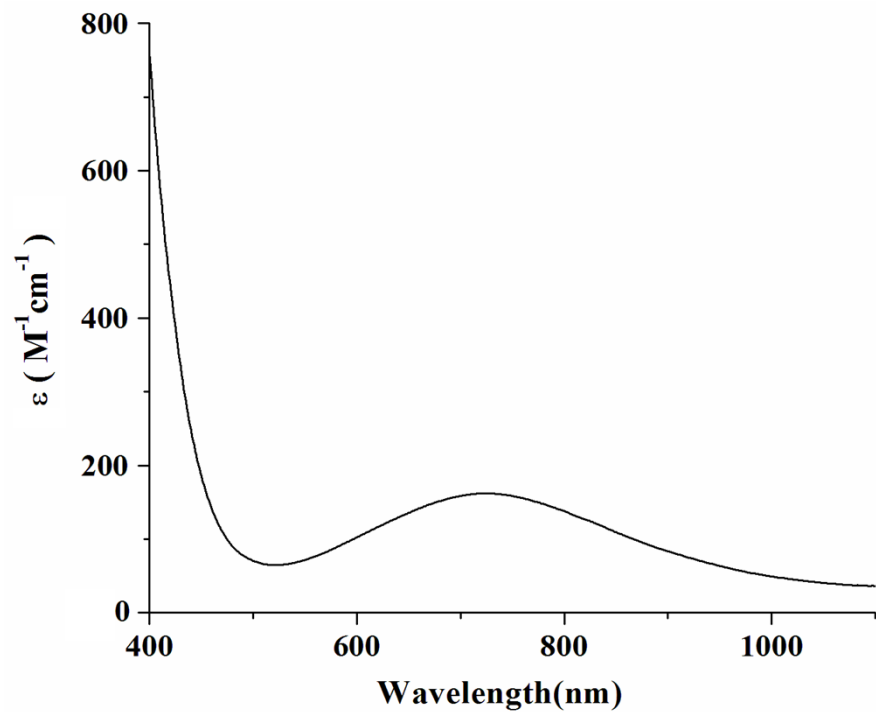

**Figure S8:** UV-visible spectrum of complex **2** in acetonitrile.

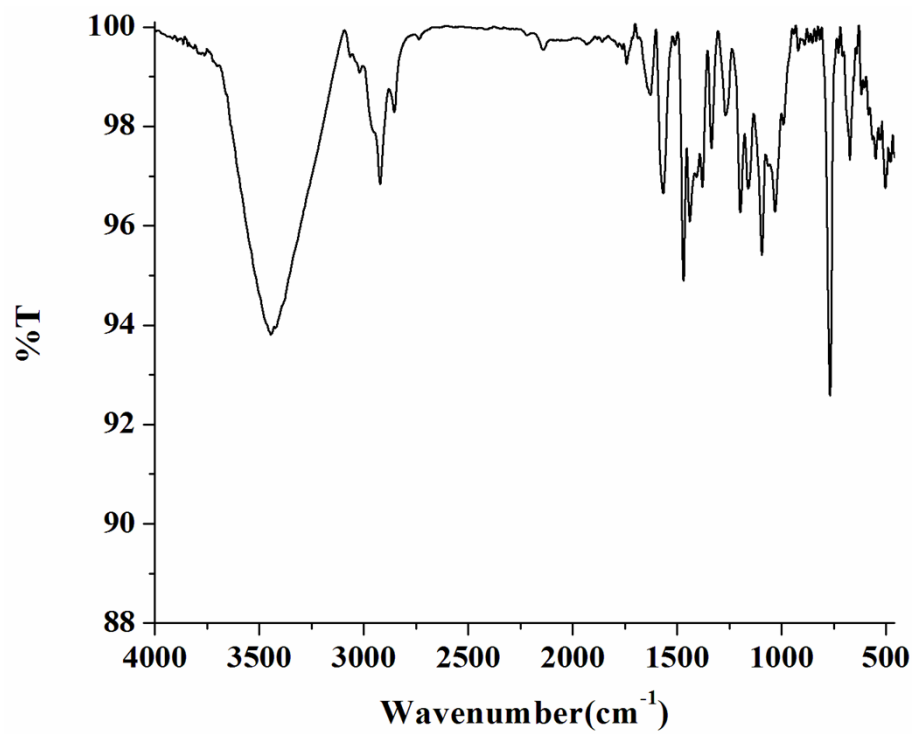

**Figure S9:** FT-IR spectrum of complex **3** in KBr pellet.

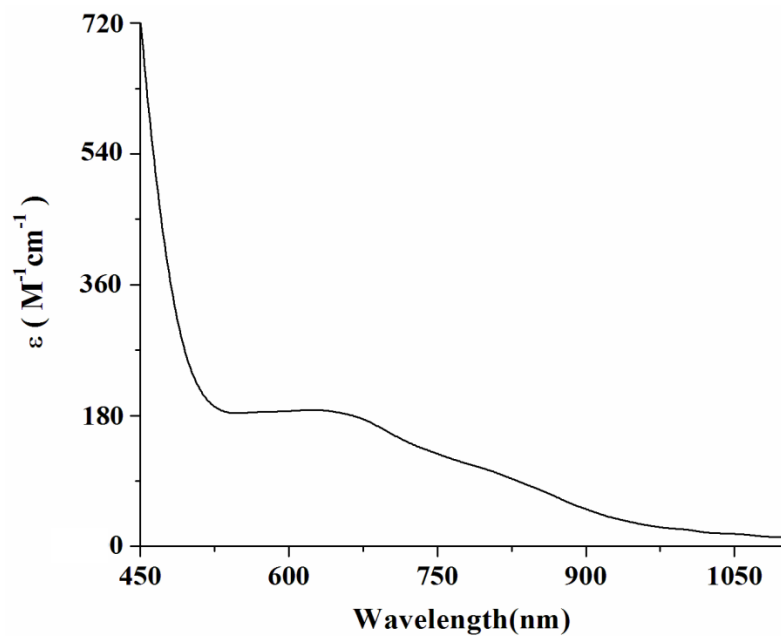

**Figure S10:** UV-visible spectrum of complex **3** in acetonitrile.

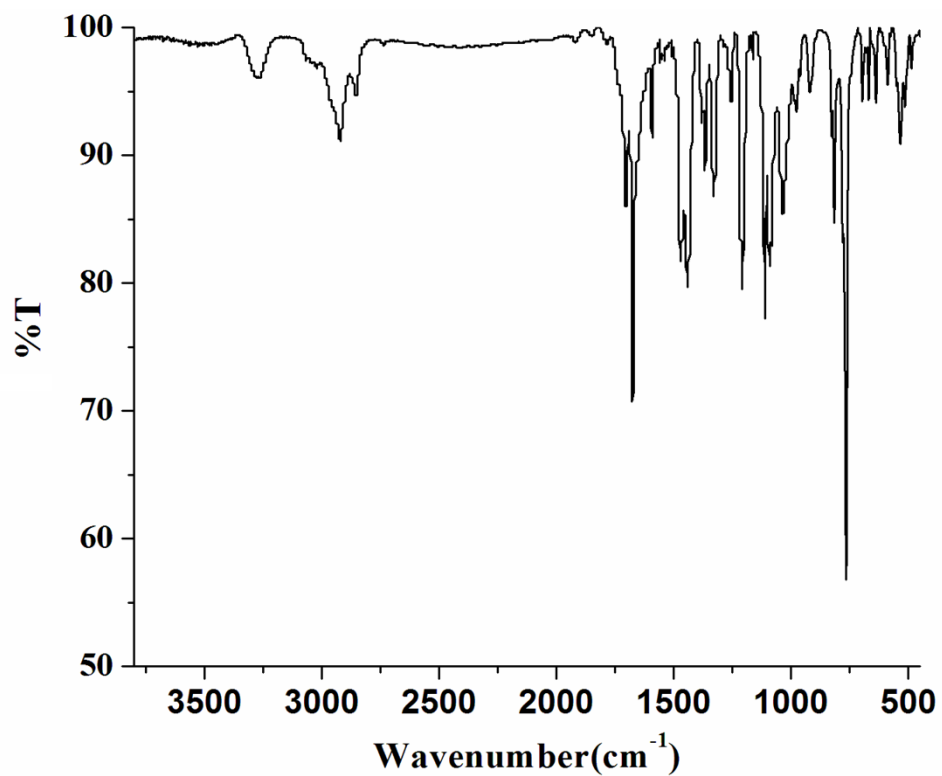

**Figure S11:** FT-IR spectrum of **L1** in KBr pellet.

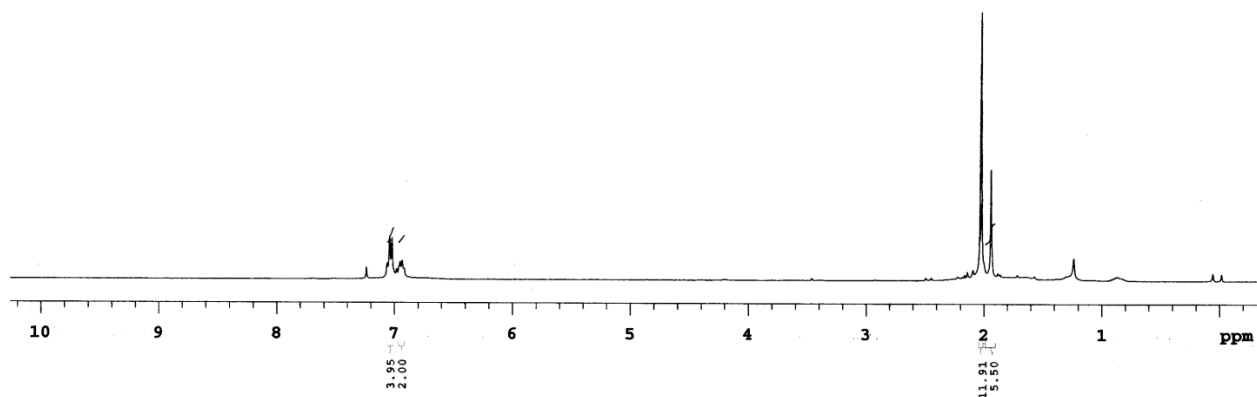

Figure S12: <sup>1</sup>H-NMR spectrum of L1 in CDCl<sub>3</sub>.

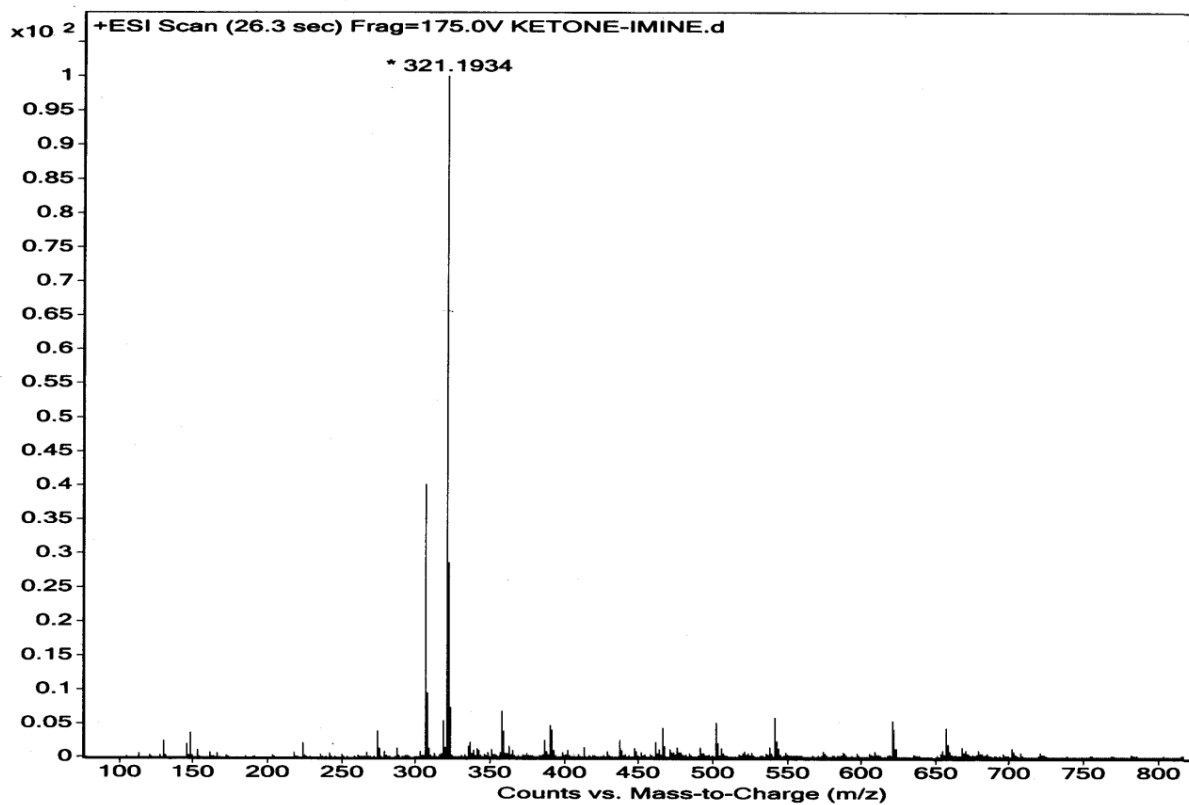

Figure S13: ESI-mass spectrum of L1 in acetonitrile.

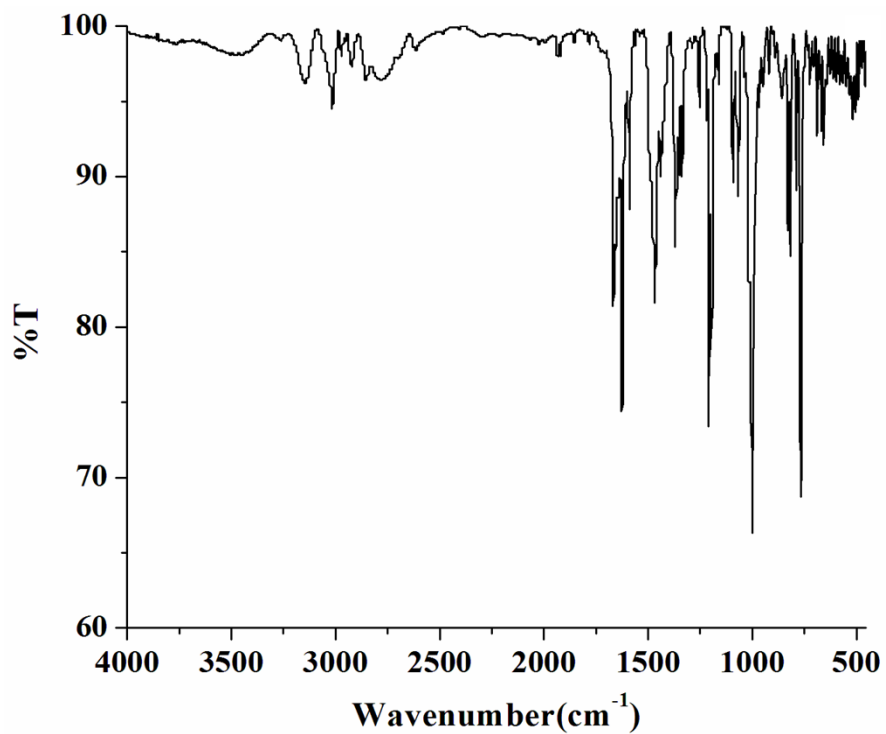

Figure S14: FT-IR spectrum of L2 in KBr pellet.

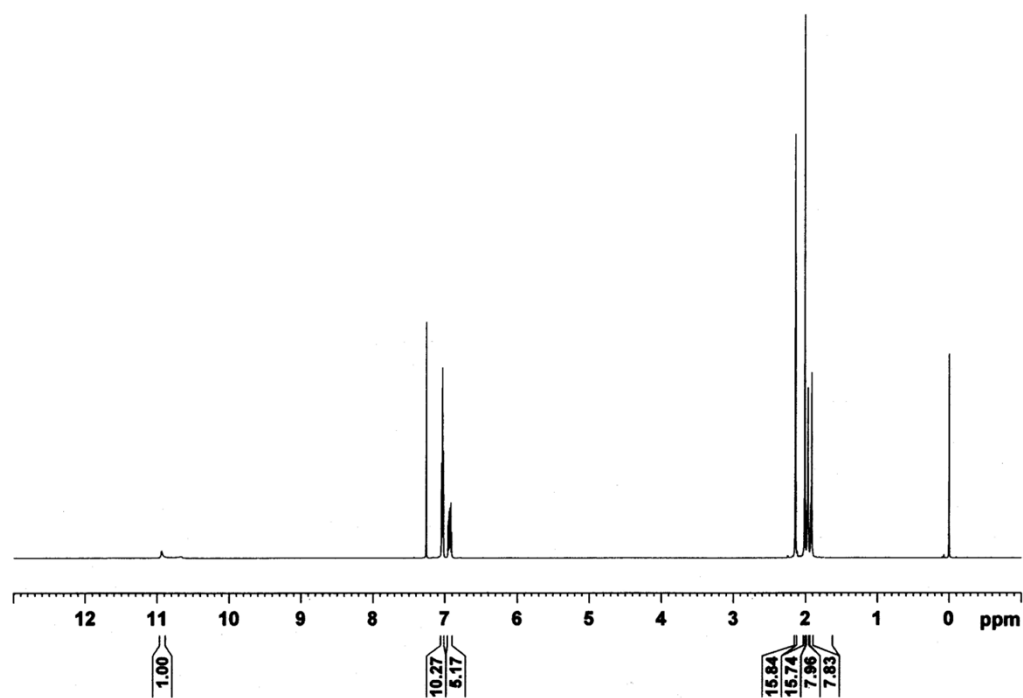

Figure S15: <sup>1</sup>H-NMR spectrum of L2 in CDCl<sub>3</sub>.



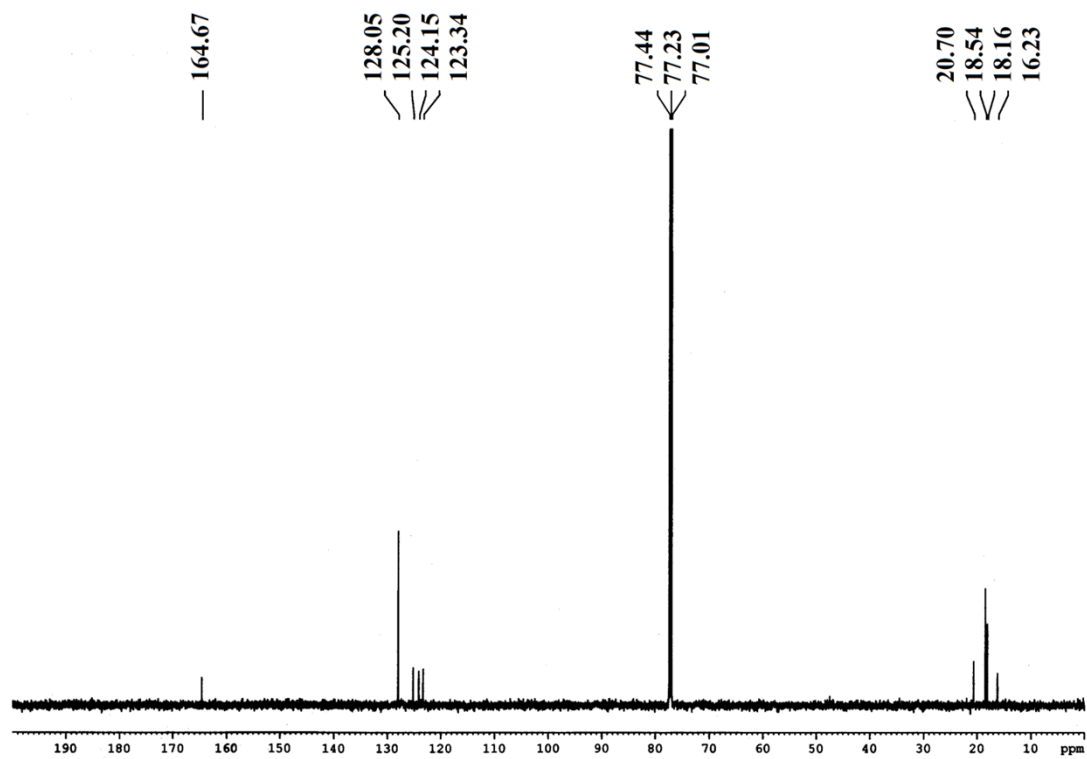

Figure S16:  $^{13}\text{C}$ -NMR spectrum of L2 in  $\text{CDCl}_3$ .
